# Supplementary material
Source: PubMed Central journal article supplement (PMC6095767)

## Supplementary Figure 1: CONSORT diagram

A.

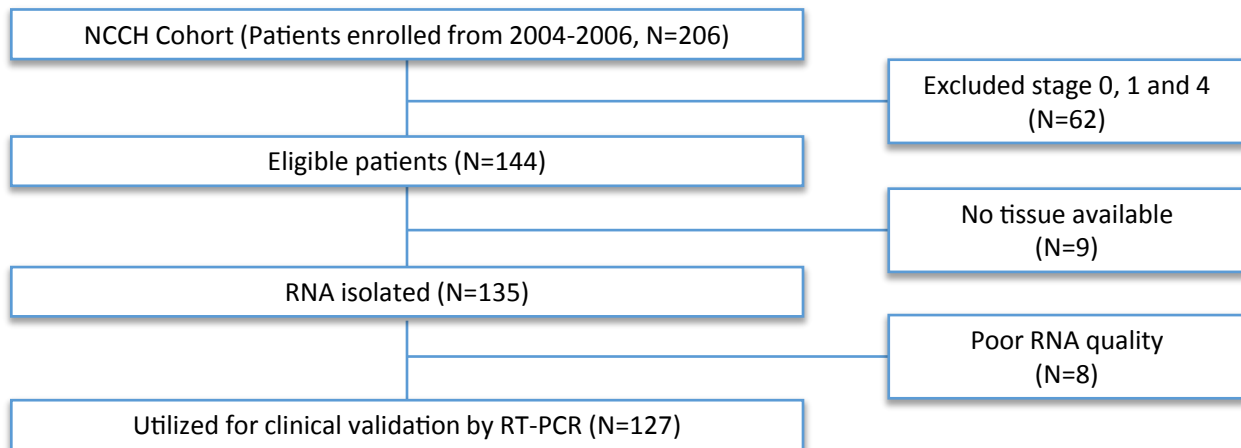

B.

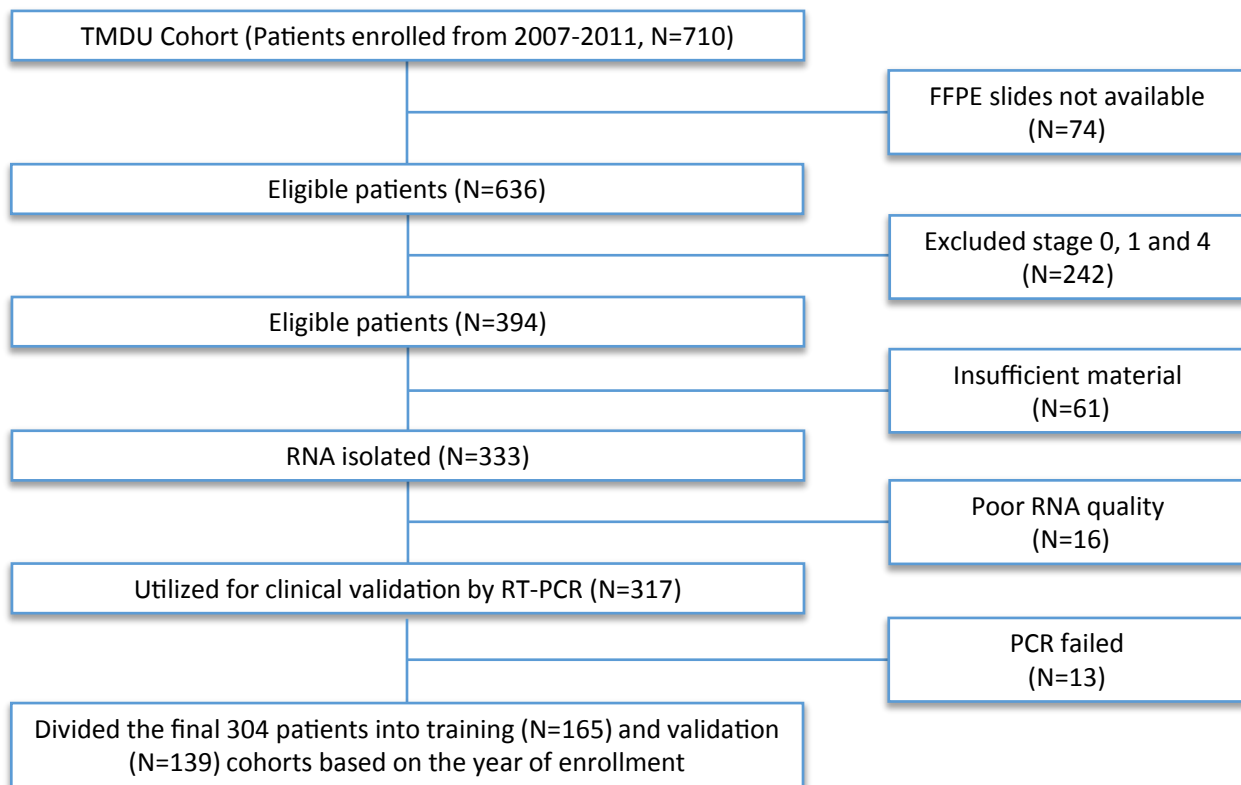

Supplement: NIHMS949752-supplement-1.pdf [file NIHMS949752-supplement-1.pdf]

# Supplementary Figure 2

## Cohort 1

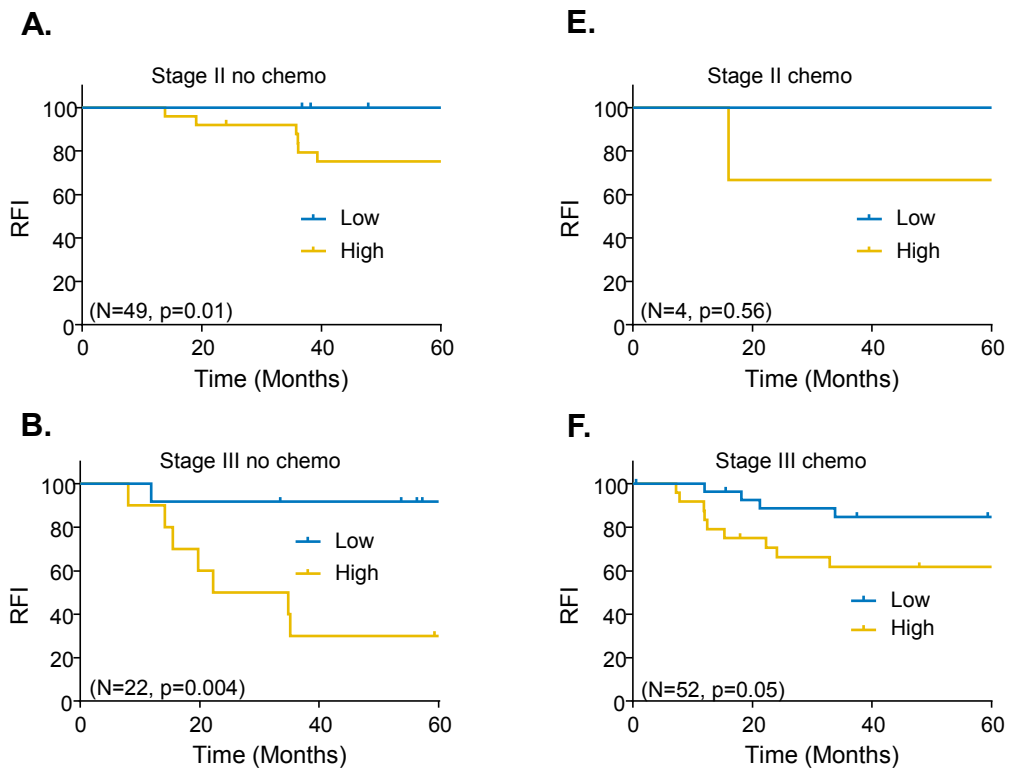

## Cohort 2 and 3

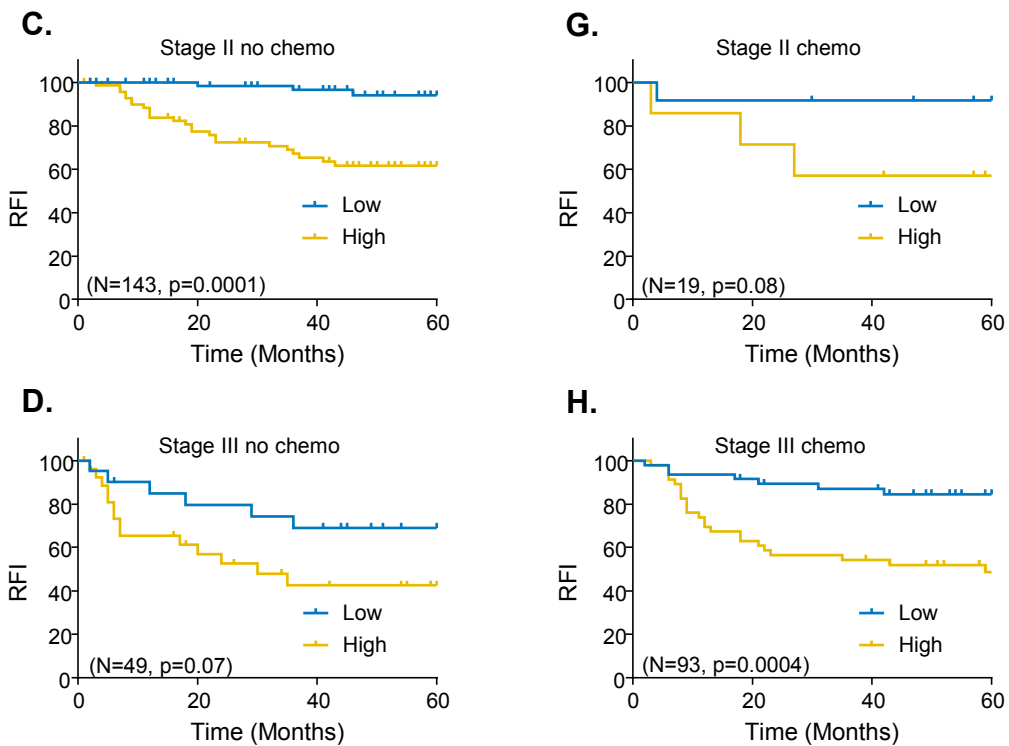

Supplement: NIHMS949752-supplement-2.pdf [file NIHMS949752-supplement-2.pdf]

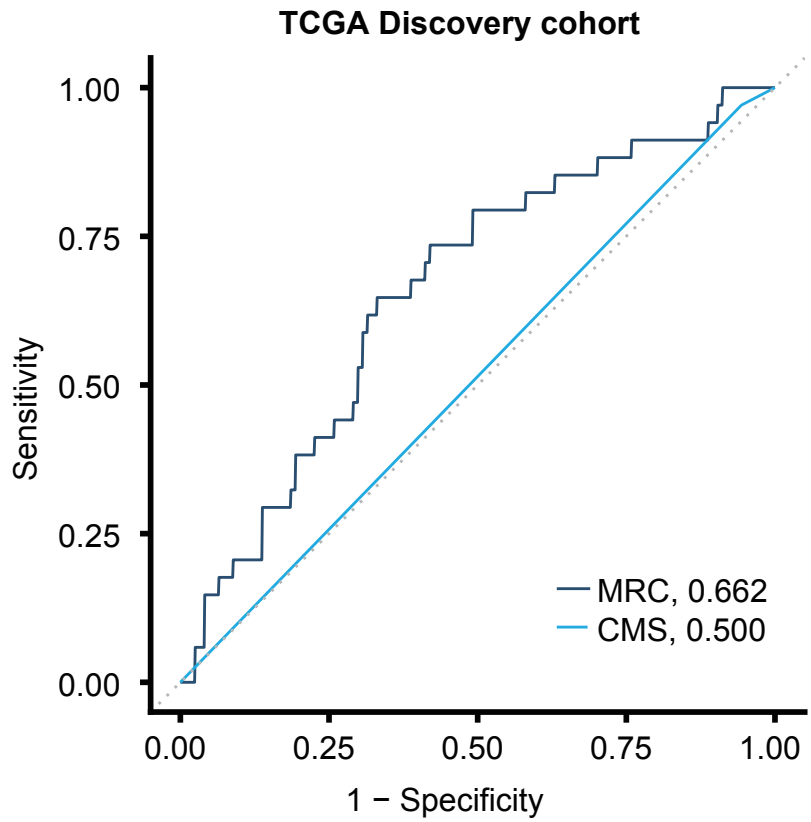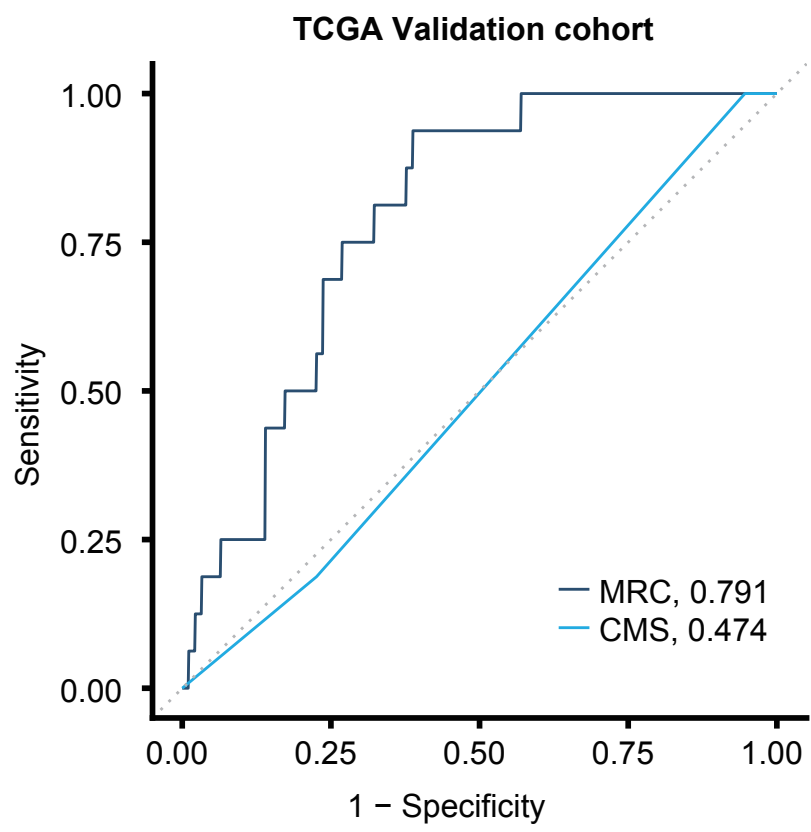

Supplement: NIHMS949752-supplement-3.pdf [file NIHMS949752-supplement-3.pdf]

# Supplementary Figure 4

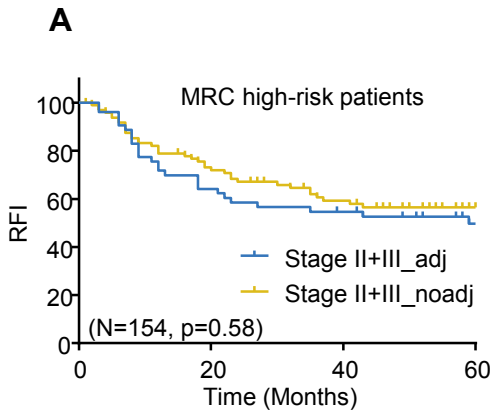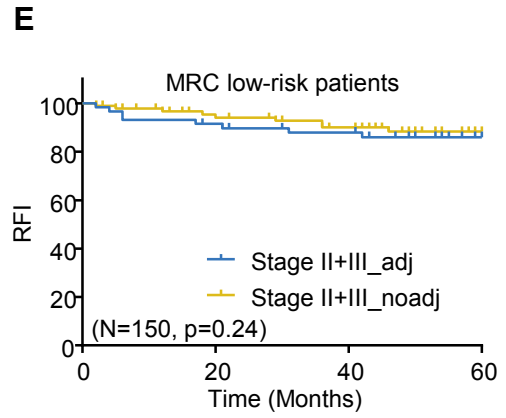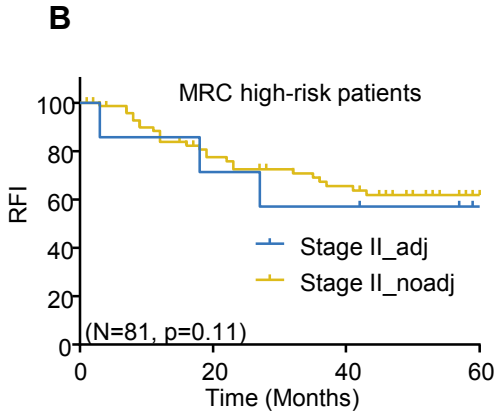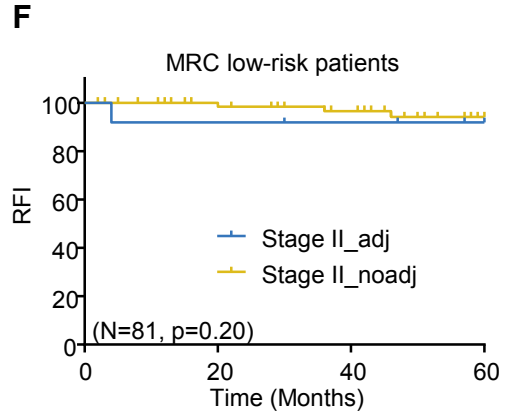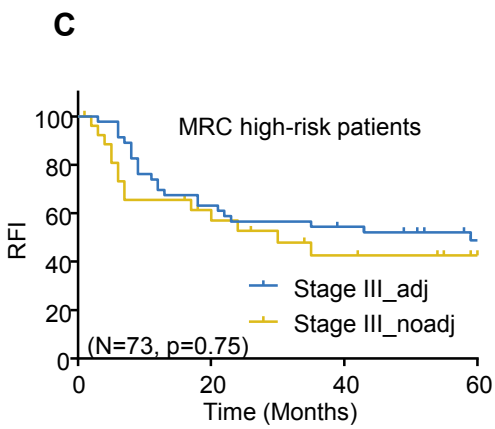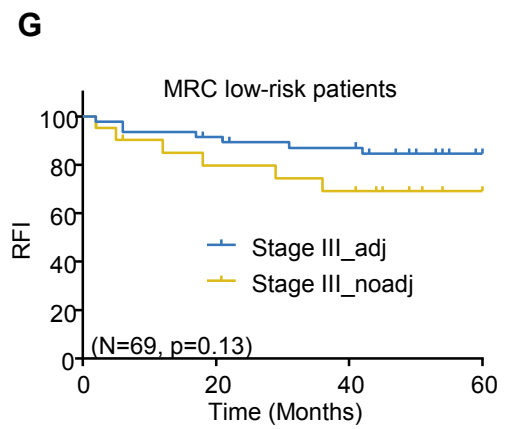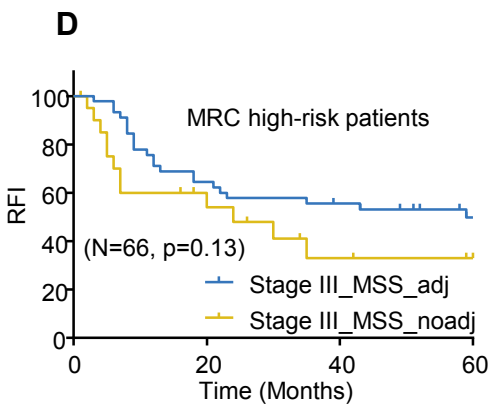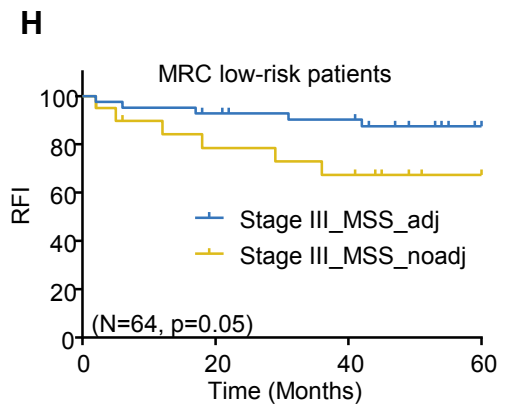

Supplement: NIHMS949752-supplement-4.pdf [file NIHMS949752-supplement-4.pdf]
